# Supplementary material for: Effects of Dietary Cereal and Protein Source on Fiber Digestibility, Composition, and Metabolic Activity of the Intestinal Microbiota in Weaner Piglets
Source: MDPI journal article supplement (doi:10.3390/ani12010109), 2022-01-04
Supplement: s1 [file s1]

**Table S1. Effects of the experimental diets on the relative abundance (%) of bacterial orders<sup>1</sup>**

|                            | Diet  |       |       |       | SEM   | P-Value |         |        |
|----------------------------|-------|-------|-------|-------|-------|---------|---------|--------|
|                            | W-SBM | W-RSM | R-SBM | R-RSM |       | CER     | PM      | CER*PM |
| Jejunum <sup>2</sup>       |       |       |       |       |       |         |         |        |
| <i>Clostridiales</i>       | 55.5  | 16.0  | 71.4  | 51.9  | 4.8   | 0.002   | 0.001   | 0.208  |
| <i>Lactobacillales</i>     | 34.9  | 70.3  | 25.3  | 43.1  | 4.5   | 0.024   | 0.002   | 0.266  |
| <i>Erysipelotrichales</i>  | 5.30  | 1.66  | 1.40  | 1.61  | 0.60  | 0.086   | 0.135   | 0.094  |
| <i>Coriobacteriales</i>    | 0.158 | 0.432 | 0.025 | 0.050 | 0.059 | 0.024   | 0.179   | 0.263  |
| <i>Enterobacteriales</i>   | 0.129 | 1.30  | 0.004 | 0.249 | 0.181 | 0.089   | 0.043   | 0.176  |
| <i>Bifidobacteriales</i>   | 0.057 | 3.24  | 1.45  | 2.65  | 0.593 | 0.733   | 0.069   | 0.402  |
| Colon ascendens            |       |       |       |       |       |         |         |        |
| <i>Clostridiales</i>       | 44.3  | 26.0  | 54.0  | 38.4  | 2.6   | 0.016   | < 0.001 | 0.751  |
| <i>Lactobacillales</i>     | 32.4  | 43.1  | 22.6  | 22.8  | 2.8   | 0.005   | 0.292   | 0.309  |
| <i>Bacteroidales</i>       | 17.5  | 23.4  | 18.2  | 26.1  | 1.4   | 0.540   | 0.014   | 0.713  |
| <i>Selenomonadales</i>     | 2.37  | 2.51  | 1.60  | 4.09  | 0.42  | 0.626   | 0.121   | 0.163  |
| <i>Aeromonadales</i>       | 1.67  | 0.610 | 0.318 | 1.37  | 0.328 | 0.657   | 0.997   | 0.115  |
| <i>Erysipelotrichales</i>  | 0.920 | 0.764 | 0.916 | 2.881 | 0.325 | 0.094   | 0.150   | 0.092  |
| <i>Coriobacteriales</i>    | 0.260 | 1.23  | 0.257 | 2.18  | 0.317 | 0.442   | 0.022   | 0.439  |
| <i>Spirochaetales</i>      | 0.200 | 0.082 | 0.346 | 0.133 | 0.043 | 0.245   | 0.055   | 0.573  |
| <i>Bifidobacteriales</i>   | 0.084 | 1.37  | 1.19  | 0.820 | 0.331 | 0.683   | 0.494   | 0.223  |
| <i>Gastranaerophilales</i> | 0.056 | 0.486 | 0.077 | 0.303 | 0.065 | 0.517   | 0.011   | 0.414  |
| <i>Desulfovibrionales</i>  | 0.028 | 0.081 | 0.030 | 0.456 | 0.100 | 0.352   | 0.238   | 0.356  |
| Faeces                     |       |       |       |       |       |         |         |        |
| <i>Clostridiales</i>       | 50.3  | 32.9  | 59.9  | 39.5  | 2.7   | 0.088   | < 0.001 | 0.751  |
| <i>Lactobacillales</i>     | 32.8  | 46.7  | 23.1  | 28.6  | 3.3   | 0.032   | 0.127   | 0.509  |
| <i>Bacteroidales</i>       | 10.6  | 12.3  | 11.0  | 16.3  | 1.1   | 0.322   | 0.123   | 0.415  |
| <i>Selenomonadales</i>     | 2.58  | 2.02  | 1.56  | 5.68  | 0.60  | 0.252   | 0.125   | 0.046  |
| <i>Erysipelotrichales</i>  | 1.02  | 0.897 | 1.04  | 3.03  | 0.287 | 0.047   | 0.083   | 0.052  |
| <i>Aeromonadales</i>       | 0.866 | 0.371 | 0.051 | 0.908 | 0.220 | 0.755   | 0.684   | 0.134  |
| <i>Spirochaetales</i>      | 0.671 | 0.098 | 0.387 | 0.179 | 0.145 | 0.730   | 0.189   | 0.537  |
| <i>Coriobacteriales</i>    | 0.624 | 1.77  | 0.488 | 3.39  | 0.357 | 0.255   | 0.003   | 0.179  |
| <i>Bifidobacteriales</i>   | 0.125 | 1.83  | 1.59  | 1.47  | 0.415 | 0.514   | 0.349   | 0.279  |
| <i>Desulfovibrionales</i>  | 0.079 | 0.186 | 0.052 | 0.263 | 0.024 | 0.543   | < 0.001 | 0.216  |
| <i>Mollicutes RF39</i>     | 0.061 | 0.056 | 0.049 | 0.058 | 0.012 | 0.844   | 0.956   | 0.783  |
| unknown WPS-2              | 0.055 | 0.197 | 0.461 | 0.227 | 0.084 | 0.202   | 0.785   | 0.272  |

W-SBM, wheat/soybean meal; W-RSM, wheat/rapeseed meal; R-SBM, rye/soybean meal; R-RSM, rye/rapeseed meal; SEM, standard error of the mean; CER, cereal; PM, protein meal

<sup>1</sup> Data are presented as means ( $n=11$ );  $P$ -values indicate effects of the factors cereal (CER), protein meal (PM) and their interaction (CER\*PM)

<sup>2</sup> W-RSM:  $n = 10$  (DNA-extract not amplifiable)

**Table S2. Effects of the experimental diets on the relative abundance (%) of bacterial genera<sup>1</sup>**

|                                      | Diet               |                    |                     |                     |       | P-Value |         |        |
|--------------------------------------|--------------------|--------------------|---------------------|---------------------|-------|---------|---------|--------|
|                                      | W-SBM              | W-RSM              | R-SBM               | R-RSM               | SEM   | CER     | PM      | CER*PM |
| Jejunum <sup>2</sup>                 |                    |                    |                     |                     |       |         |         |        |
| <i>Clostridium sensu stricto 1</i>   | 44.3 <sup>a</sup>  | 3.69 <sup>b</sup>  | 47.5 <sup>a</sup>   | 36.4 <sup>a</sup>   | 3.94  | 0.005   | < 0.001 | 0.021  |
| <i>Streptococcus</i>                 | 22.8               | 37.8               | 22.0                | 32.5                | 3.8   | 0.692   | 0.101   | 0.774  |
| <i>Lactobacillus</i>                 | 11.2               | 31.4               | 3.01                | 10.1                | 3.9   | 0.050   | 0.069   | 0.376  |
| <i>Terrisporobacter</i>              | 8.00               | 2.21               | 15.4                | 8.73                | 1.53  | 0.018   | 0.033   | 0.876  |
| <i>Turicibacter</i>                  | 5.23               | 1.34               | 1.32                | 1.56                | 0.58  | 0.094   | 0.099   | 0.062  |
| <i>Romboutsia</i>                    | 1.81               | 0.828              | 1.53                | 1.52                | 0.349 | 0.774   | 0.493   | 0.497  |
| <i>Sarcina</i>                       | 0.354              | 6.74               | 6.59                | 4.66                | 1.828 | 0.577   | 0.551   | 0.269  |
| unknown <i>Streptococcaceae</i>      | 0.284 <sup>a</sup> | 0.049 <sup>b</sup> | 0.214 <sup>ab</sup> | 0.209 <sup>ab</sup> | 0.027 | 0.360   | 0.017   | 0.022  |
| unknown <i>Lactobacillales</i>       | 0.118              | 0.037              | 0.057               | 0.168               | 0.030 | 0.559   | 0.799   | 0.111  |
| <i>Intestinibacter</i>               | 0.113              | 0.050              | 0.059               | 0.056               | 0.018 | 0.504   | 0.357   | 0.408  |
| <i>Bifidobacterium</i>               | 0.047              | 3.20               | 1.32                | 2.64                | 0.555 | 0.744   | 0.046   | 0.404  |
| <i>Olsenella</i>                     | 0.039              | 0.159              | 0.015               | 0.016               | 0.021 | 0.037   | 0.125   | 0.130  |
| unknown <i>Peptostreptococcaceae</i> | 0.035              | 0.029              | 0.058               | 0.072               | 0.009 | 0.080   | 0.805   | 0.590  |
| Colon ascendens                      |                    |                    |                     |                     |       |         |         |        |
| <i>Clostridium sensu stricto 1</i>   | 16.0               | 1.47               | 20.2                | 7.33                | 1.77  | 0.085   | < 0.001 | 0.775  |
| <i>Agathobacter</i>                  | 4.20               | 3.32               | 4.00                | 3.38                | 0.33  | 0.918   | 0.273   | 0.844  |
| <i>Blautia</i>                       | 2.42               | 2.97               | 2.71                | 3.59                | 0.21  | 0.280   | 0.096   | 0.698  |
| <i>Coprococcus 3</i>                 | 0.778              | 1.14               | 1.13                | 1.21                | 0.088 | 0.223   | 0.214   | 0.421  |
| <i>Alloprevotella</i>                | 0.766              | 0.688              | 1.05                | 0.780               | 0.128 | 0.481   | 0.516   | 0.722  |
| <i>Dorea</i>                         | 0.546              | 0.891              | 0.909               | 1.18                | 0.116 | 0.159   | 0.184   | 0.879  |
| <i>Intestinibacter</i>               | 0.484 <sup>a</sup> | 0.131 <sup>b</sup> | 0.269 <sup>ab</sup> | 0.306 <sup>ab</sup> | 0.045 | 0.820   | 0.069   | 0.026  |
| <i>Lachnospira</i>                   | 0.455              | 0.633              | 0.438               | 0.698               | 0.059 | 0.839   | 0.071   | 0.730  |
| <i>Lachnospiraceae NC2004 group</i>  | 0.350              | 0.489              | 0.614               | 0.362               | 0.057 | 0.551   | 0.622   | 0.093  |
| <i>Faecalibacterium</i>              | 0.341              | 0.793              | 0.725               | 2.35                | 0.311 | 0.113   | 0.090   | 0.333  |
| <i>Coprococcus 1</i>                 | 0.260              | 0.381              | 0.308               | 0.164               | 0.074 | 0.578   | 0.940   | 0.384  |
| <i>Fusicatenibacter</i>              | 0.226              | 0.158              | 0.154               | 0.354               | 0.035 | 0.366   | 0.342   | 0.056  |
| <i>Lachnoclostridium</i>             | 0.197              | 0.199              | 0.140               | 0.161               | 0.027 | 0.403   | 0.838   | 0.863  |
| <i>Christensenellaceae R-7 group</i> | 0.178              | 0.061              | 0.390               | 0.239               | 0.071 | 0.181   | 0.354   | 0.908  |
| <i>Anaerovibrio</i>                  | 0.173              | 0.104              | 0.237               | 0.190               | 0.036 | 0.319   | 0.442   | 0.882  |
| <i>Lachnospiraceae FCS020 group</i>  | 0.152              | 0.103              | 0.073               | 0.099               | 0.012 | 0.069   | 0.604   | 0.103  |
| <i>Acidaminococcus</i>               | 0.142              | 0.131              | 0.138               | 0.105               | 0.026 | 0.778   | 0.678   | 0.844  |
| <i>Asteroleplasma</i>                | 0.140              | 0.245              | 0.062               | 0.380               | 0.067 | 0.831   | 0.120   | 0.428  |
| <i>Catenisphaera</i>                 | 0.136              | 0.032              | 0.157               | 0.345               | 0.048 | 0.082   | 0.657   | 0.125  |
| <i>Catenibacterium</i>               | 0.107              | 0.137              | 0.133               | 1.31                | 0.293 | 0.313   | 0.311   | 0.335  |
| <i>Coprococcus 2</i>                 | 0.097              | 0.170              | 0.051               | 0.067               | 0.026 | 0.151   | 0.389   | 0.577  |
| <i>Family XIII AD3011 group</i>      | 0.095              | 0.045              | 0.148               | 0.070               | 0.013 | 0.128   | 0.014   | 0.594  |
| <i>Bifidobacterium</i>               | 0.084              | 1.37               | 1.19                | 0.820               | 0.331 | 0.683   | 0.494   | 0.223  |
| <i>Collinsella</i>                   | 0.071              | 0.152              | 0.120               | 0.418               | 0.053 | 0.129   | 0.069   | 0.292  |
| <i>Holdemanella</i>                  | 0.067              | 0.172              | 0.219               | 0.392               | 0.041 | 0.019   | 0.075   | 0.659  |
| <i>Butyricicoccus</i>                | 0.066              | 0.033              | 0.021               | 0.094               | 0.011 | 0.695   | 0.327   | 0.013  |
| <i>Acetitomaculum</i>                | 0.056              | 0.096              | 0.145               | 0.072               | 0.029 | 0.583   | 0.779   | 0.338  |
| <i>Fournierella</i>                  | 0.045              | 0.073              | 0.165               | 0.106               | 0.019 | 0.047   | 0.675   | 0.252  |
| <i>Desulfovibrio</i>                 | 0.028              | 0.081              | 0.030               | 0.456               | 0.100 | 0.352   | 0.238   | 0.356  |
| <i>Intestinimonas</i>                | 0.020              | 0.059              | 0.029               | 0.046               | 0.008 | 0.897   | 0.078   | 0.477  |
| <i>Enterorhabdus</i>                 | 0.018              | 0.040              | 0.014               | 0.042               | 0.006 | 0.954   | 0.023   | 0.779  |
| Faeces                               |                    |                    |                     |                     |       |         |         |        |
| <i>Streptococcus</i>                 | 26.1               | 32.7               | 16.2                | 18.6                | 3.1   | 0.057   | 0.468   | 0.729  |
| <i>Clostridium sensu stricto 1</i>   | 20.3               | 3.03               | 27.2                | 9.39                | 2.18  | 0.060   | < 0.001 | 0.944  |
| <i>Lactobacillus</i>                 | 6.54               | 13.9               | 6.73                | 10.0                | 2.01  | 0.653   | 0.199   | 0.621  |

|                                      |       |       |       |       |       |       |         |       |
|--------------------------------------|-------|-------|-------|-------|-------|-------|---------|-------|
| unknown.Muribaculacea                | 5.70  | 2.64  | 4.78  | 4.79  | 0.62  | 0.622 | 0.222   | 0.219 |
| <i>Terrisporobacter</i>              | 3.08  | 0.883 | 7.77  | 3.03  | 0.669 | 0.004 | 0.004   | 0.268 |
| <i>Subdoligranulum</i>               | 2.73  | 1.35  | 1.65  | 2.01  | 0.54  | 0.852 | 0.646   | 0.433 |
| <i>Agathobacter</i>                  | 2.15  | 2.27  | 1.21  | 1.30  | 0.29  | 0.104 | 0.861   | 0.973 |
| <i>Ruminococcaceae</i> UCG-005       | 2.14  | 1.56  | 1.91  | 1.22  | 0.20  | 0.457 | 0.110   | 0.888 |
| <i>Prevotella</i> 9                  | 2.11  | 5.22  | 2.64  | 7.13  | 0.83  | 0.449 | 0.022   | 0.666 |
| unknown <i>Lachnospiraceae</i>       | 1.81  | 2.22  | 1.62  | 2.66  | 0.20  | 0.757 | 0.076   | 0.430 |
| unknown <i>Ruminococcaceae</i>       | 1.71  | 0.88  | 1.50  | 1.09  | 0.15  | 0.999 | 0.042   | 0.483 |
| <i>Blautia</i>                       | 1.71  | 2.83  | 1.78  | 2.80  | 0.26  | 0.974 | 0.039   | 0.922 |
| <i>Megasphaera</i>                   | 1.58  | 0.668 | 0.643 | 1.54  | 0.299 | 0.955 | 0.988   | 0.141 |
| <i>Christensenellaceae</i> R-7 group | 1.50  | 0.450 | 0.974 | 0.441 | 0.184 | 0.453 | 0.031   | 0.468 |
| <i>Ruminococcaceae</i> UCG-002       | 1.26  | 1.47  | 0.913 | 1.34  | 0.197 | 0.558 | 0.438   | 0.783 |
| <i>Syntrophococcus</i>               | 1.15  | 2.57  | 0.268 | 1.34  | 0.286 | 0.054 | 0.024   | 0.742 |
| <i>Prevotellaceae</i> NK3B31 group   | 1.14  | 1.24  | 1.27  | 0.538 | 0.211 | 0.499 | 0.464   | 0.338 |
| <i>Ruminococcaceae</i> NK4A214 group | 0.817 | 1.09  | 0.974 | 1.05  | 0.134 | 0.831 | 0.532   | 0.725 |
| <i>Ruminococcus</i> 2                | 0.770 | 0.433 | 0.317 | 0.265 | 0.093 | 0.098 | 0.295   | 0.441 |
| <i>Marvinbryantia</i>                | 0.766 | 0.641 | 0.410 | 0.586 | 0.049 | 0.035 | 0.787   | 0.116 |
| <i>Roseburia</i>                     | 0.761 | 0.734 | 0.549 | 0.413 | 0.123 | 0.294 | 0.746   | 0.829 |
| <i>Treponema</i> 2                   | 0.671 | 0.098 | 0.387 | 0.177 | 0.145 | 0.729 | 0.188   | 0.538 |
| <i>Phascolarctobacterium</i>         | 0.581 | 0.484 | 0.729 | 1.10  | 0.109 | 0.079 | 0.519   | 0.274 |
| <i>Ruminococcaceae</i> UCG-008       | 0.532 | 0.153 | 1.11  | 0.377 | 0.077 | 0.001 | < 0.001 | 0.118 |
| <i>Coprococcus</i> 3                 | 0.525 | 1.36  | 0.924 | 1.59  | 0.130 | 0.188 | 0.003   | 0.726 |
| <i>Ruminococcus</i> 1                | 0.494 | 0.366 | 0.356 | 0.283 | 0.045 | 0.232 | 0.274   | 0.764 |
| <i>Dorea</i>                         | 0.483 | 0.845 | 0.637 | 1.20  | 0.141 | 0.367 | 0.106   | 0.721 |
| Family XIII AD3011 group             | 0.468 | 0.187 | 0.534 | 0.289 | 0.049 | 0.368 | 0.007   | 0.841 |
| <i>Turicibacter</i>                  | 0.441 | 0.144 | 0.290 | 0.133 | 0.059 | 0.483 | 0.054   | 0.544 |
| <i>Prevotella</i> 7                  | 0.436 | 0.881 | 0.135 | 1.41  | 0.192 | 0.758 | 0.025   | 0.266 |
| <i>uminococcaceae</i> UCG-014        | 0.422 | 0.533 | 0.554 | 0.603 | 0.053 | 0.356 | 0.464   | 0.772 |
| <i>Succinivibrio</i>                 | 0.393 | 0.179 | 0.051 | 0.832 | 0.181 | 0.670 | 0.439   | 0.178 |
| <i>Oribacterium</i>                  | 0.373 | 0.690 | 0.238 | 0.435 | 0.060 | 0.091 | 0.028   | 0.597 |
| <i>Lachnospiraceae</i> NK4A136 group | 0.332 | 0.220 | 0.397 | 0.231 | 0.053 | 0.725 | 0.203   | 0.805 |
| <i>Intestinibacter</i>               | 0.308 | 0.098 | 0.264 | 0.312 | 0.035 | 0.206 | 0.228   | 0.059 |
| unknown (Family.Prevotellaceae)      | 0.298 | 0.391 | 0.230 | 0.486 | 0.059 | 0.912 | 0.149   | 0.495 |
| <i>Lachnospiraceae</i> NC2004 group  | 0.289 | 0.335 | 0.424 | 0.223 | 0.042 | 0.894 | 0.359   | 0.147 |
| <i>Olsenella</i>                     | 0.271 | 0.950 | 0.148 | 2.33  | 0.312 | 0.291 | 0.019   | 0.208 |
| <i>Rikenellaceae</i> RC9 gut group   | 0.252 | 0.506 | 0.438 | 0.414 | 0.075 | 0.759 | 0.455   | 0.367 |
| <i>Collinsella</i>                   | 0.226 | 0.223 | 0.175 | 0.423 | 0.039 | 0.323 | 0.110   | 0.103 |
| <i>Prevotella</i> 2                  | 0.213 | 0.244 | 0.226 | 0.514 | 0.056 | 0.198 | 0.150   | 0.242 |
| <i>Lachnospiraceae</i> NK3A20 group  | 0.191 | 0.249 | 0.103 | 0.270 | 0.050 | 0.742 | 0.278   | 0.598 |
| <i>Coprococcus</i> 1                 | 0.189 | 0.428 | 0.231 | 0.190 | 0.082 | 0.560 | 0.554   | 0.406 |
| <i>Catenisphaera</i>                 | 0.184 | 0.048 | 0.214 | 0.747 | 0.092 | 0.038 | 0.249   | 0.056 |
| <i>Lachnospira</i>                   | 0.178 | 0.354 | 0.175 | 0.216 | 0.048 | 0.468 | 0.265   | 0.488 |
| <i>Mogibacterium</i>                 | 0.172 | 0.137 | 0.081 | 0.131 | 0.018 | 0.189 | 0.840   | 0.247 |
| <i>Fusicatenibacter</i>              | 0.148 | 0.160 | 0.101 | 0.366 | 0.041 | 0.323 | 0.087   | 0.117 |
| <i>Oscillospira</i>                  | 0.147 | 0.260 | 0.190 | 0.149 | 0.030 | 0.576 | 0.551   | 0.205 |
| <i>Catenibacterium</i>               | 0.145 | 0.177 | 0.167 | 1.15  | 0.224 | 0.272 | 0.263   | 0.294 |
| <i>Lachnospiraceae</i> ND3007 group  | 0.142 | 0.326 | 0.283 | 0.277 | 0.041 | 0.577 | 0.286   | 0.252 |
| <i>Prevotella</i> 1                  | 0.139 | 0.579 | 0.180 | 0.319 | 0.096 | 0.570 | 0.137   | 0.435 |
| <i>Solobacterium</i>                 | 0.130 | 0.082 | 0.078 | 0.194 | 0.025 | 0.548 | 0.486   | 0.099 |
| unknown Family XIII                  | 0.128 | 0.196 | 0.068 | 0.129 | 0.045 | 0.494 | 0.486   | 0.967 |
| <i>Bifidobacterium</i>               | 0.125 | 1.83  | 1.59  | 1.47  | 0.415 | 0.514 | 0.349   | 0.279 |
| <i>Faecalibacterium</i>              | 0.121 | 0.535 | 0.516 | 0.815 | 0.088 | 0.048 | 0.037   | 0.731 |
| unknown <i>Veillonellaceae</i>       | 0.111 | 0.076 | 0.025 | 0.092 | 0.017 | 0.288 | 0.636   | 0.129 |
| <i>Lachnospiraceae</i> FCS020 group  | 0.109 | 0.117 | 0.096 | 0.155 | 0.016 | 0.694 | 0.312   | 0.438 |

|                                    |       |       |       |       |       |       |         |       |
|------------------------------------|-------|-------|-------|-------|-------|-------|---------|-------|
| unknown <i>Streptococcaceae</i>    | 0.101 | 0.052 | 0.098 | 0.063 | 0.013 | 0.884 | 0.118   | 0.796 |
| <i>Intestinimonas</i>              | 0.096 | 0.120 | 0.043 | 0.075 | 0.019 | 0.211 | 0.468   | 0.914 |
| <i>Ruminococcaceae</i> UCG-010     | 0.088 | 0.125 | 0.076 | 0.094 | 0.022 | 0.643 | 0.557   | 0.842 |
| <i>Ruminococcaceae</i> UCG-013     | 0.084 | 0.021 | 0.077 | 0.069 | 0.016 | 0.520 | 0.266   | 0.389 |
| <i>Desulfovibrio</i>               | 0.079 | 0.186 | 0.052 | 0.263 | 0.024 | 0.543 | < 0.001 | 0.216 |
| <i>Prevotellaceae</i> UCG-003      | 0.078 | 0.033 | 0.176 | 0.097 | 0.018 | 0.022 | 0.075   | 0.622 |
| <i>Ruminococcaceae</i> UCG-004     | 0.076 | 0.050 | 0.152 | 0.077 | 0.016 | 0.110 | 0.116   | 0.440 |
| <i>Lachnoclostridium</i>           | 0.069 | 0.181 | 0.065 | 0.091 | 0.018 | 0.170 | 0.051   | 0.217 |
| <i>Holdemanella</i>                | 0.069 | 0.236 | 0.227 | 0.314 | 0.039 | 0.128 | 0.102   | 0.598 |
| <i>Shuttleworthia</i>              | 0.067 | 0.792 | 0.334 | 0.045 | 0.151 | 0.427 | 0.471   | 0.098 |
| unknown <i>Mollicutes</i> RF39     | 0.061 | 0.056 | 0.049 | 0.058 | 0.012 | 0.844 | 0.956   | 0.783 |
| unknown <i>WPS-2</i>               | 0.055 | 0.197 | 0.461 | 0.227 | 0.084 | 0.202 | 0.785   | 0.272 |
| <i>Ruminiclostridium</i> 9         | 0.054 | 0.072 | 0.056 | 0.058 | 0.010 | 0.745 | 0.626   | 0.697 |
| <i>Alloprevotella</i>              | 0.049 | 0.250 | 0.352 | 0.153 | 0.045 | 0.246 | 0.994   | 0.027 |
| <i>Ruminiclostridium</i> 5         | 0.048 | 0.039 | 0.076 | 0.054 | 0.008 | 0.167 | 0.304   | 0.682 |
| unknown <i>Atopobiaceae</i>        | 0.044 | 0.361 | 0.055 | 0.345 | 0.035 | 0.959 | < 0.001 | 0.796 |
| <i>Fournierella</i>                | 0.043 | 0.061 | 0.105 | 0.088 | 0.016 | 0.164 | 0.986   | 0.582 |
| <i>Sarcina</i>                     | 0.027 | 0.090 | 1.35  | 0.438 | 0.158 | 0.005 | 0.137   | 0.089 |
| <i>Candidatus_Soleaferrea</i>      | 0.027 | 0.051 | 0.054 | 0.085 | 0.012 | 0.199 | 0.233   | 0.885 |
| unknown <i>Bacteroidales</i>       | 0.024 | 0.107 | 0.077 | 0.145 | 0.024 | 0.345 | 0.120   | 0.879 |
| <i>Acetitomaculum</i>              | 0.022 | 0.152 | 0.017 | 0.105 | 0.023 | 0.555 | 0.018   | 0.643 |
| unknown <i>Erysipelotrichaceae</i> | 0.021 | 0.061 | 0.034 | 0.006 | 0.011 | 0.353 | 0.779   | 0.132 |
| <i>Enterorhabdus</i>               | 0.017 | 0.093 | 0.050 | 0.123 | 0.012 | 0.151 | 0.001   | 0.936 |
| unknown <i>Coriobacteriales</i>    | 0.017 | 0.089 | 0.017 | 0.076 | 0.011 | 0.768 | 0.004   | 0.750 |

*W-SBM*, wheat/soybean meal; *W-RSM*, wheat/rapeseed meal; *R-SBM*, rye/soybean meal; *R-RSM*, rye/rapeseed meal; *SEM*, standard error of the mean; *CER*, cereal; *PM*, protein meal

<sup>1</sup> Data are presented as means ( $n=11$ );  $P$ -values indicate effects of the factors cereal (*CER*), protein meal (*PM*) and their interaction (*CER\*PM*)

<sup>2</sup> *W-RSM*:  $n = 10$  (DNA-extract not amplifiable)

<sup>a, b</sup> Values within a row with different superscripts differ significantly at  $P \leq 0.05$  (Tukey Test)
